# Supplementary material for: Transcription factor EB coordinates environmental cues to regulate T regulatory cells’ mitochondrial fitness and function
Source: PubMed Central journal article supplement — Proc Natl Acad Sci U S A. 2022 Jul 27;119(31):e2205469119. doi: 10.1073/pnas.2205469119 (PMC9351480; doi:10.1073/pnas.2205469119), 2022-07-27
Supplement: pnas.2205469119.sapp.pdf [file pnas.2205469119.sapp.pdf]

1  
2  
3  
4  
5  
6  
7  
8  
9  
10  
11  
12  
13  
14  
15  
16  
17  
18  
19  
20  
21  
22  
23  
24

**Supplementary Information for**

**Transcription factor EB coordinates environmental cues to regulate T regulatory cells mitochondrial fitness and function**

Minghui Xia<sup>a,1</sup>, Cai Zhang<sup>a,b,1</sup>, Yufei Chen<sup>a</sup>, Xiujuan Zhao<sup>a</sup>, Si Zhang<sup>c</sup>, Yang Liu<sup>a</sup>, You Cai<sup>a</sup>, Zhengping Wei<sup>a</sup>, Qiuyang Du<sup>a</sup>, Wenting Yu<sup>d,e</sup>, Chun Zhou<sup>e</sup>, Hongjun Xiao<sup>d</sup>, Guihua Wang<sup>f</sup>, Xiang Cheng<sup>c</sup>, Heng Mei<sup>g</sup>, Arian Laurence<sup>h</sup>, Jing Wang<sup>a</sup>, Yu Hu<sup>g</sup>, Huabin Li<sup>d,e,2</sup>, Xiang-Ping Yang<sup>a,2</sup>

Correspondence: Huabin Li (allergyli@163.com), Xiang-Ping Yang (yangxp@hust.edu.cn)

**This PDF file includes:**

Supplementary material and method  
Figures S1 to S7

## 25 **Supplementary material and method**

### 26 **Mice**

27 *Foxp3*<sup>YFP-Cre</sup> transgenic mice, *Cd4*<sup>Cre</sup> transgenic mice and *Rag2*<sup>-/-</sup> mice were obtained from  
28 The Jackson Laboratory. *Tcfef*<sup>fl/fl</sup> mice were generated by CRISPR/Cas9 technology. In  
29 brief, two *loxP* sites were inserted into upstream of exon 5 and downstream of exon 7 of  
30 *Tcfef*. sgRNAs to target either a region upstream of the exon 5 (sgRNA: 5'-  
31 TTTGTACAAGTCCTAGGGAGGGG-3') or downstream of the exon 7 (sgRNA: 5'-  
32 TGTCTTGACGCAGTAGGAGCAGG-3') were cloned into the pCS plasmid and then  
33 were assessed for on-target activity using a Universal CRISPR Activity Assay (UCATM,  
34 Biocytogen Pharmaceuticals). Then, *Cas9* mRNA, targeting vector, and sgRNAs were co-  
35 injected into the cytoplasm of one-cell stage fertilized C57BL/6 eggs. The injected zygotes  
36 were transferred into oviducts of Kunming pseudopregnant females to generate F0 mice.  
37 The *Tcfef*<sup>fl/fl</sup> mice were crossed with *Cd4*<sup>Cre</sup> transgenic mice or *Foxp3*<sup>YFP-Cre</sup> transgenic  
38 mice in C57BL/6 background to produce age-matched *Cd4*<sup>Cre</sup>*Tcfef*<sup>fl/fl</sup> mice, *Foxp3*<sup>YFP-  
39 Cre</sup>*Tcfef*<sup>fl/fl</sup> mice, and control mice for experiments. Mice were maintained in a specific  
40 pathogen-free facility, and all animal experiments in accordance with guidelines were  
41 approved by the Institutional Animal Care and Use Committee of Tongji Medical College,  
42 HUST.

43

### 44 **T cell-transfer colitis**

45 CD4<sup>+</sup>CD25<sup>+</sup>YFP<sup>+</sup> Treg cells were sorted from the spleens and lymph nodes of *Foxp3*<sup>YFP-  
46 cre</sup> and *Foxp3*<sup>YFP-cre</sup>*Tcfef*<sup>fl/fl</sup> mice (6-8-wk-old) and CD45RB<sup>hi</sup> CD25<sup>-</sup>CD4<sup>+</sup> T cells were  
47 sorted from the spleens and mesenteric lymph nodes of WT congenic mice. 2×10<sup>5</sup> naïve  
48 CD4<sup>+</sup> T cells mixed with 2×10<sup>5</sup> WT or *Tcfef*-deficient Treg cells were transferred *i.p.* into  
49 *Rag2*<sup>-/-</sup> mice. Recipient mice were weighted weekly and analyzed 12 weeks after transfer.

50

### 51 **BM chimera**

52 Bone marrows were isolated from *Foxp3*<sup>YFP-cre</sup> (CD45.1<sup>+</sup>CD45.2<sup>+</sup>) mice or age-matched  
53 *Foxp3*<sup>YFP-cre</sup>*Tcfef*<sup>fl/fl</sup> (CD45.1<sup>+</sup>CD45.2<sup>+</sup>) mice. CD45.1<sup>+</sup> mice (10-wk-old) were sub-  
54 lethally irradiated with 5 Gy and intravenously injected with a 1:1 mixture of BM cells  
55 (5×10<sup>6</sup> cells per mouse). Mice were analyzed at 8 weeks after reconstitution.

56

### 57 **RNA-sequencing analysis**

58 Wild-type or *Tcfef*-deficient naïve CD4<sup>+</sup> T cells were isolated from age-matched *Tcfef*<sup>fl/fl</sup>  
59 and CD4<sup>Cre</sup> *Tcfef*<sup>fl/fl</sup> mice using negative magnetic selection (Mouse naïve CD4<sup>+</sup> T Cell  
60 Isolation Kit; Miltenyi). Naïve CD4<sup>+</sup> T cells were differentiated under Treg conditions for  
61 60 h. 2×10<sup>6</sup> Treg cells were used for total RNA isolation with TRIzol (Invitrogen) and  
62 subjected to RNA-sequencing using Illumina Nextseq 500. The raw reads were aligned to  
63 the mouse reference genome (version mm10), using Tophat2 RNASeq alignment software.  
64 Differentially expressed transcripts were identified by limma (1) based on moderated *t*-test,

65 and the Benjamini-Hochberg method was used to adjust the  $p$  value. R package  
66 clusterProfiler (2) was used to identify enriched pathways in gene ontology (GO) analysis.  
67 Lists of differentially expressed genes with a cut-off of  $p$  value  $< 0.05$  were selected to  
68 identify enriched biological processes. The raw RNA-seq data were deposited in the  
69 Genome Sequence Archive at National Genomics Data Center under accession number  
70 CRA007442 that are publicly accessible at <https://ngdc.cn.cb.ac.cn/gsa>.

71

## 72 **Metabolic analysis**

73 Seahorse XFe96 Extracellular Flux Analyzer (Agilent Technologies) was used for  
74 metabolic experiments. WT or *Tcf7*-deficient naive CD4<sup>+</sup> T cells were incubated with  
75 plate-bound anti-CD3 plus anti-CD28 (5  $\mu$ g/ml of each), anti-IL-4 and anti-IFN- $\gamma$  (10  
76 mg/ml of each), TGF- $\beta$  (5 ng/ml) and hIL-2 (10 ng/ml) for 72 h. Cells were washed and  
77 resuspended with Seahorse XF Base Medium (Agilent Technologies) supplemented with  
78 2 mM L-glutamine and 1 mM sodium pyruvate and  $1 \times 10^6$  cells were seeded into one well  
79 of the 96-well seahorse assay plate 12 h before seahorse testing. The ECAR and OCR for  
80 each well were determined. Intracellular amounts of ATP in Treg cells differentiated from  
81 WT or *Tcf7*-deficient naive CD4<sup>+</sup> T cells were measured using luminescent ATP detection  
82 assay kit (Beyotime Biotechnology) according to the manufacturer's instructions.

83

## 84 **T cell differentiation and retroviral transduction**

85 Naive CD4<sup>+</sup>CD44<sup>low</sup>CD62L<sup>high</sup> T lymphocytes were sorted with FACS Aria II after  
86 enrichment with CD4<sup>+</sup> T cell negative isolation kit (Miltenyi Biotec). T cells were cultured  
87 with RPMI 1640 complete medium containing supplemented with 10% (vol/vol) heat-  
88 inactivated FBS (Gibco), 1% (vol/vol) penicillin-streptomycin, 1 mM sodium pyruvate  
89 (Thermo Fisher Scientific), 1 $\times$ NEAA (Thermo Fisher Scientific) and 50  $\mu$ M  $\beta$ -  
90 mercaptoethanol (Millipore Sigma). For Th0 conditions, naive CD4<sup>+</sup> cells were stimulated  
91 with plate-bound anti-CD3 (5  $\mu$ g/ml) and anti-CD28 (5  $\mu$ g/ml) in the presence of anti-IL-  
92 4 (10  $\mu$ g/ml) and anti-IFN- $\gamma$  (10  $\mu$ g/ml). For Th17 conditions, TGF- $\beta$  (2 ng/ml), IL-6 (10  
93 ng/ml), anti-IL-2 (10  $\mu$ g/ml), anti-IL-4 (10  $\mu$ g/ml) and anti-IFN- $\gamma$  (10  $\mu$ g/ml) were included  
94 in cultures. For Treg cell differentiation, TGF- $\beta$  (5 ng/ml), hIL-2 (10 ng/ml), anti-IL-4 (10  
95  $\mu$ g/ml) and anti-IFN- $\gamma$  (10  $\mu$ g/ml) were added for 3 days.

96

97 TFEB-S211A retrovirus was described previously (3). Full-length cDNA encoding  
98 Myc and TFEB were PCR-amplified, TFEB was then tagged with HA by nest PCR  
99 amplification. Myc and HA-TFEB was cloned in to MSCV-IRES-EGFP (MIG) vector by  
100 enzyme digestion, followed by homologous recombination. For generation of retroviral  
101 particles, HEK293T cells were grown to a confluency of 80-90% and were transfected with  
102 retroviral constructs and pCL-Eco plasmid at a 2:1 ratio using lipofectamine 2000. Viruses  
103 were collected at day 2-3 after transfection. For retrovirus transduction, naive  
104 CD4<sup>+</sup>CD44<sup>low</sup>CD62L<sup>high</sup> T lymphocytes were activated by plate-bound anti-CD3 (5  $\mu$ g/ml,

105 Bio X Cell) plus anti-CD28 (5 µg/ml, Bio X Cell) in 48-well plates for 24 h and then  
106 transduced with the retroviral particles in the presence of 12 µg/ml polybrene by  
107 centrifugation at 2000 rpm for 2 h. After transfection, T cells were cultured under Treg  
108 differentiation conditions as described above.

109

### 110 **Mitochondrial morphology and membrane potential analysis**

111 For electron microscopy analysis of mitochondrial morphology,  $5 \times 10^6$  Treg cells were  
112 fixed in 2.5% glutaraldehyde (Sigma Aldrich) in 0.1 M phosphate buffer (pH 7.4, pre-  
113 warmed at 37°C for 5 min) at room temperature followed by 2 h on ice. After fixation, cells  
114 were rinsed 5 times for 1 min each in 0.1 M phosphate buffer, then post-fixed in 2% OsO<sub>4</sub>  
115 in 0.1 M phosphate buffer for 2 h. After 3 times wash for 15 min each in 0.1 M phosphate  
116 buffer (pH 7.4), cell were dehydrated at room temperature with graded ethanol series as  
117 followed (30%, 50%, 70%, 80%, 90%, 100%) for 15 min each. Samples then undergo resin  
118 penetration and embedding with EMBED 812 (SPI). After polymerization in a 65°C oven  
119 for 48 h, sections were cut to 60-80 nm thin slide on the ultramicrotome (Leica UC7), and  
120 fished out onto the 150 meshes cuprum grids. The cuprum grids were then stained with 2%  
121 uranium acetate saturated alcohol solution and 2.6% Lead citrate in turn. After staining,  
122 the cuprum grids are observed under HT-7700 electron microscope (Hitachi HT-7700) at  
123 an accelerating voltage of 80 KV, Images were taken at either 2500× or 7000×  
124 magnification.

125

126 For analysis of mitochondrial membrane potential, MitoTracker Deep Red FM  
127 (Thermo Fisher Scientific), MitoTracker Green FM (Thermo Fisher Scientific) and TMRE  
128 (tetramethylrodamine, ethyl ester, Thermo Fisher Scientific) were used. MitoTracker Deep  
129 Red FM and TMRE were both membrane potential dependent mitochondrial dyes. In brief,  
130  $1 \times 10^6$  Treg cells washed twice by ice-cold PBS, were incubated with MitoTracker Deep  
131 FM (50 nM), MitoTracker Green FM (50 nM) or TMRE (20 nM) for 20 min in PBS at  
132 37 °C. Cells were washed and the indicated dyes were detected by flow cytometry.

133

134

### 135 **Real-time PCR analysis**

136 Cells were harvested and total RNAs were extracted using TRIzol (Invitrogen), cDNA was  
137 synthesized with cDNA Reverse Transcription Kit (TOYOBO) and analyzed using a Bio-  
138 Rad SYBR Green intercalating fluorophore system (Applied Biosystems). Data were  
139 normalized to the expression of β-actin using  $\Delta\Delta CT$ .

140

### 141 **Flow cytometry**

142 Cells were stained in PBS containing 0.5% FBS with indicated fluorochrome-conjugated  
143 antibodies for surface marker analysis. For intracellular cytokine expression analysis, cells  
144 were stimulated with phorbol 12-myristate 13-acetate (PMA, 50 ng/ml, Millipore Sigma),  
145 ionomycin (500 ng/ml, Millipore Sigma), together with Golgi-plug (BD Bioscience) for 4

146 h and stained with a Cytfix/Cytoperm Fixation/Permeabilization Kit (BD Bioscience)  
147 according to the manufacturer's recommendations. Intranuclear protein (Foxp3, Ki67)  
148 staining was performed with Foxp3/Transcription Factor Staining Buffer Set (Thermo  
149 Fisher Scientific) according to the manufacturer's instructions after cell surface staining.  
150 Phospho-protein staining of p-S6 was performed according to the manufacturer's  
151 recommendations.

152

### 153 **Immunoblot analysis**

154 Cells were lysed using RIPA lysis buffers containing protease inhibitor cocktail (Roche)  
155 and phosphatase inhibitor cocktail (Millipore Sigma), for 30 min on ice and then  
156 centrifuged at 12000 g for 10 min at 4 °C. Then protein concentrations in samples were  
157 quantified by BCA assay before loading the samples for electrophoresis and membrane  
158 transfer. The blots were probed with the following primary antibodies overnight at 4 °C:  
159 anti-TFEB (Abcam), anti-p-S6<sup>Ser235/Ser236</sup> (D57.2.2E, CST), anti-p-STAT5<sup>Tyr694</sup> (C71E5,  
160 CST), anti-S6 (54D2, CST), anti-STAT5 (D2O6Y, CST), anti-STAT5 (D2O6Y, CST),  
161 anti-LC3A/B (D3U4C, CST), anti-Cathepsin B (D1C7Y, CST), anti-p-TFEB<sup>Ser211</sup> (E9S8N,  
162 CST). All blots were then incubated with corresponding secondary antibodies for  
163 subsequent enhanced chemiluminescent (ECL) exposure (RPN2232, GE healthcare). The  
164 band intensities of all the immunoblot were analyzed by ImageJ software.

165

### 166 **Immunofluorescence**

167 For measuring TFEB expression upon TCR and IL-2 stimulation, purified naïve CD4<sup>+</sup> T  
168 cells were stimulated with plate-bound anti-CD3 (5 µg/ml) and anti-CD28 (5 µg/ml) for  
169 24 h. For detection of LC3 puncta, naïve CD4<sup>+</sup> T cells were stimulated with plate-bound  
170 anti-CD3 (5 µg/ml) and anti-CD28 (5 µg/ml) for 60 h under Treg differentiation condition.  
171 Afterwards, cells were fixed with 4% paraformaldehyde for 10 min. Fixed samples were  
172 permeabilized for 20 min by 0.5% Triton-X. After blocking with 5% BSA in PBS for 1 h.  
173 Primary antibodies were used as followed: anti-TFEB (D4L2P, CST), anti-LC3A/B  
174 (D3U4C, CST), anti-CD4 monoclonal antibody (RM4-5, Thermo Fisher Scientific).

175

### 176 **Histology**

177 After induction of colitis, small intestines were collected and fixed in 10% neutral buffered  
178 formalin, embedded in paraffin, and sectioned for staining with hematoxylin and eosin.

179

### 180 **Chromatin-immunoprecipitation assay**

181 For H3K4me3 immunoprecipitation, in vitro differentiated Treg cell were used. For HA-  
182 tag immunoprecipitation, retroviral transduction was performed before T cells were  
183 cultured under Treg cell differentiation condition. Cells were harvested and treated with 1%  
184 formaldehyde for 15 min for fix and crosslinking. The crosslinking reactions was stopped  
185 by adding glycine to a final concentration of 125 mM and incubating for 5 min at room  
186 temperature. Afterwards, 6×10<sup>6</sup> cells were lysed and Chromatin was fragmented by

187 sonication. Chromatin was then immunoprecipitated with 2 µg of anti-HA (CST, C29F4),  
188 anti-H3K4me3 (Abcam, Ab8580) or IgG control antibodies at 4 °C overnight. After  
189 washing and elution, crosslinks were reversed for 4 h at 65°C. The eluted DNA was  
190 purified and analyzed by qPCR using a Bio-Rad SYBR Green intercalating fluorophore  
191 system.

192

193 Primers used to amplify the H3K4me3 enriched region of *foxp3* promoter were F, 5'-  
194 AACACAATGCTGTCTCTACCTGCC-3', R, 5'-CCCTCACCACAGAGGTAAGG-  
195 TA-3'. Primer used to amplify TFEB binding site in *Myc* promoter were F, 5'-GCAAA-  
196 TCCCGAGGGAATATGCAT-3', R, 5' CCTGAATACTACGCTGTGCATTCT-3'.

197

### 198 **Mice starvation**

199 C57/BL6 mice were starved for 24 h, TFEB expression in spleens was determined by  
200 immunofluorescent staining. For the immunoblot assay of TFEB expression in CD4<sup>+</sup> T  
201 cells, mice were starved for 36 h and CD4<sup>+</sup> T lymphocytes were isolated from spleens using  
202 CD4<sup>+</sup> T Cell Isolation Kit (Miltenyi Biotec). For the detection of Treg in periphery blood,  
203 C57/BL6 mice were starved for 48 h.

204

### 205 ***In vitro* Treg suppression assay**

206 CD4<sup>+</sup>CD25<sup>+</sup>YFP<sup>+</sup> Treg cells were sorted from spleens of *Foxp3*<sup>YFP-cre</sup> or *Foxp3*<sup>YFP-</sup>  
207 <sup>cre</sup>*Tcfcb*<sup>fl/fl</sup> mice with FACS Aria II. Sorted naïve CD4<sup>+</sup> T cells were labeled with CellTrace  
208 Violet (CTV, Thermo Fisher Scientific). CTV-labeled naïve cells (1x10<sup>5</sup> cells per well)  
209 were cultured alone or at different ratios of sorted wild-type or *Tcfcb*-deficient Treg cells  
210 in the presence of plate-coated anti-CD3 (1µg/ml) and anti-CD28 (1 µg/ml) antibodies. On  
211 day 3, cells were harvested and analyzed by flow cytometry.

212

213 For CD8<sup>+</sup> T cells proliferation suppression assay, CD8<sup>+</sup> T cells were isolated from WT  
214 mice using negative magnetic selection (Mouse CD8<sup>+</sup> T Cell Isolation Kit; Miltenyi) and  
215 stained with CellTrace CFSE (Thermo Fisher Scientific). CFSE-stained CD8<sup>+</sup> T cells  
216 (1×10<sup>5</sup> cells/well) were cultured alone or together with FACS-sorted wild-type or *Tcfcb*-  
217 deficient CD4<sup>+</sup>CD25<sup>+</sup>YFP<sup>+</sup> Treg cells in the presence of plate-coated anti-CD3 (1 µg/ml)  
218 and anti-CD28 (1 µg/ml) antibodies. On day 3, cells were harvested and analyzed by flow  
219 cytometry.

220

### 221 **Tumor models and isolation of TILs**

222 Isolated tumor-derived cell lines (TDCLs) lung cancer cell line was provided by Dr.  
223 Shuguo Sun (4). In brief, TDCLs derived from a *Kras*<sup>LSL-G12D/+</sup>; *Tp53*<sup>fl/fl</sup> conditional  
224 NSCLC model, were cultured in RPMI 1640 supplemented with 10% FBS. Tumor cells  
225 (1.5×10<sup>6</sup> cells per mouse) were injected *s.c.* into 8 weeks old and *Foxp3*<sup>YFP-cre</sup>*Tcfcb*<sup>fl/fl</sup> and  
226 their sex-matched littermate *Foxp3*<sup>YFP-cre</sup> mice. Tumor volumes were measured along major

227 axis (a) and minor axis (b) daily and were calculated using the formula:  $V=ab^2/2$ . Mice  
228 were sacrificed and tumors were excised and weighted.

229

230 For TILs isolation, tumor specimens were gently minced into small pieces, then  
231 digested with 6 ml PBS containing 50  $\mu$ l 25 mg/ml collagenase IV (Invitrogen) and 25  
232  $\mu$ l 10 mg/ml DNase I (Roche) for 1 h at 37°C. Cell suspensions were filtered twice and  
233 centrifuged at 1500 rpm for 5 min. Tumor cells and TILs were enriched and harvested  
234 separately by Percoll gradient (GE healthcare) following the manufacturer's protocol.

235

### 236 **Statistical analysis**

237 Statistical analysis was performed using GraphPad Prism software. Statistical significance  
238 was determined by Student's *t* test or for variances by ANOVA.  $p < 0.05$  was considered  
239 significant. Data are presented as Means  $\pm$  SEM.

240

241  
242  
243  
244  
245  
246  
247  
248  
249  
250  
251

**Figure S1**

(A) Confocal microscopy analysis of TFEB in spleens from given ad libitum access to normal chow diet or starved C57/BL6 mice for 24 h. Scale bars, 20  $\mu$ m. (B) Flow cytometric analysis (left) and quantitative results of geometric MFI (right) of p-S6 in splenocytes sorted from untreated or starved C57/BL6 mice. (C) Flow cytometric analysis (left) and quantitative results of CD4<sup>+</sup>Foxp3<sup>+</sup> Treg cells in the peripheral blood of untreated or starved C57/BL6 mice for 48 h (n=5). (D) Immunoblot analysis of cytoplasmic and nuclear TFEB expression in TCR-activated CD4<sup>+</sup> T cells in the presence of anti-mIL-2 and varying amounts of hIL-2 for 12 h. \* $p < 0.05$ , \*\*\* $p < 0.001$ . Data are means  $\pm$  SEM and were analyzed by two-tailed, unpaired Student's  $t$ -test.

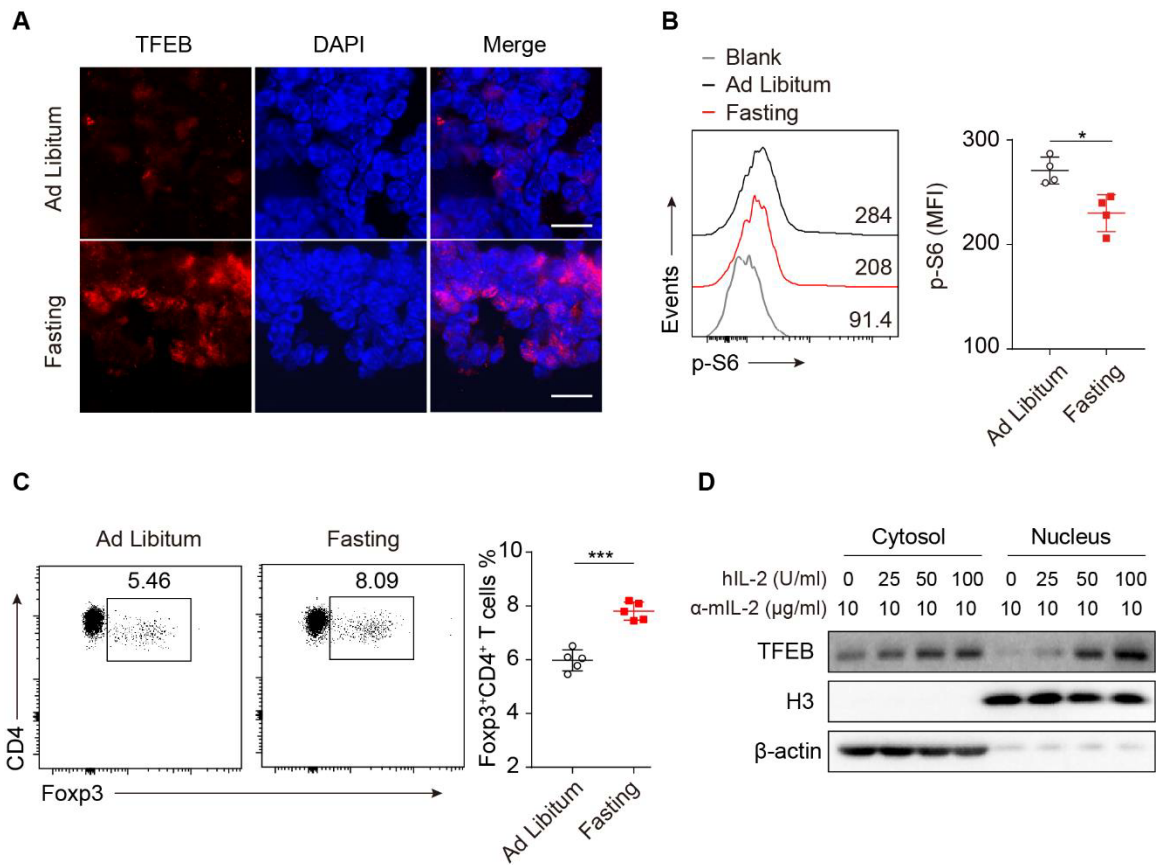

252



253 **Figure S2**

254 (A) Real-time PCR analysis of *Tcfef* mRNA expression in CD4<sup>+</sup> T cells isolated from  
255 *Tcfef*<sup>fl/fl</sup> mice and *Cd4*<sup>Cre</sup>*Tcfef*<sup>fl/fl</sup> mice. (B) Immunoblot analysis of TFEB protein  
256 expression in CD4<sup>+</sup> T cells isolated from *Tcfef*<sup>fl/fl</sup> mice and *Cd4*<sup>Cre</sup>*Tcfef*<sup>fl/fl</sup> mice. (C)  
257 Confocal microscopy analysis of TFEB (Red) in spleens from *Cd4*<sup>Cre</sup>*Tcfef*<sup>fl/fl</sup> mice. Scale  
258 bars, 10 μm. (D, E) CD4<sup>+</sup>Foxp3<sup>+</sup>NRP1<sup>+</sup> tTregs (D) and CD4<sup>+</sup>Foxp3<sup>+</sup>NRP1<sup>-</sup> pTregs (E) in  
259 spleen, pLNs and colonic LP of 20-wk-old *Tcfef*<sup>fl/fl</sup> and *Cd4*<sup>Cre</sup>*Tcfef*<sup>fl/fl</sup> mice (n=4). (F-H)  
260 Total cell numbers in spleen and pLNs (F) Representative plots and frequencies of  
261 CD44<sup>hi</sup>CD62L<sup>low</sup>CD4<sup>+</sup> or CD44<sup>hi</sup>CD62L<sup>low</sup>CD8<sup>+</sup> T cells in splenocytes (G), and IFN-γ-  
262 producing CD4<sup>+</sup> or CD8<sup>+</sup> T cells in splenocytes (H) from 20-wk-old *Tcfef*<sup>fl/fl</sup> mice and  
263 *Cd4*<sup>Cre</sup>*Tcfef*<sup>fl/fl</sup> mice (n=4). Data are representative of four (A, B) experiments. Data are  
264 means ± SEM and were analyzed by two-tailed, Student's *t*-test.

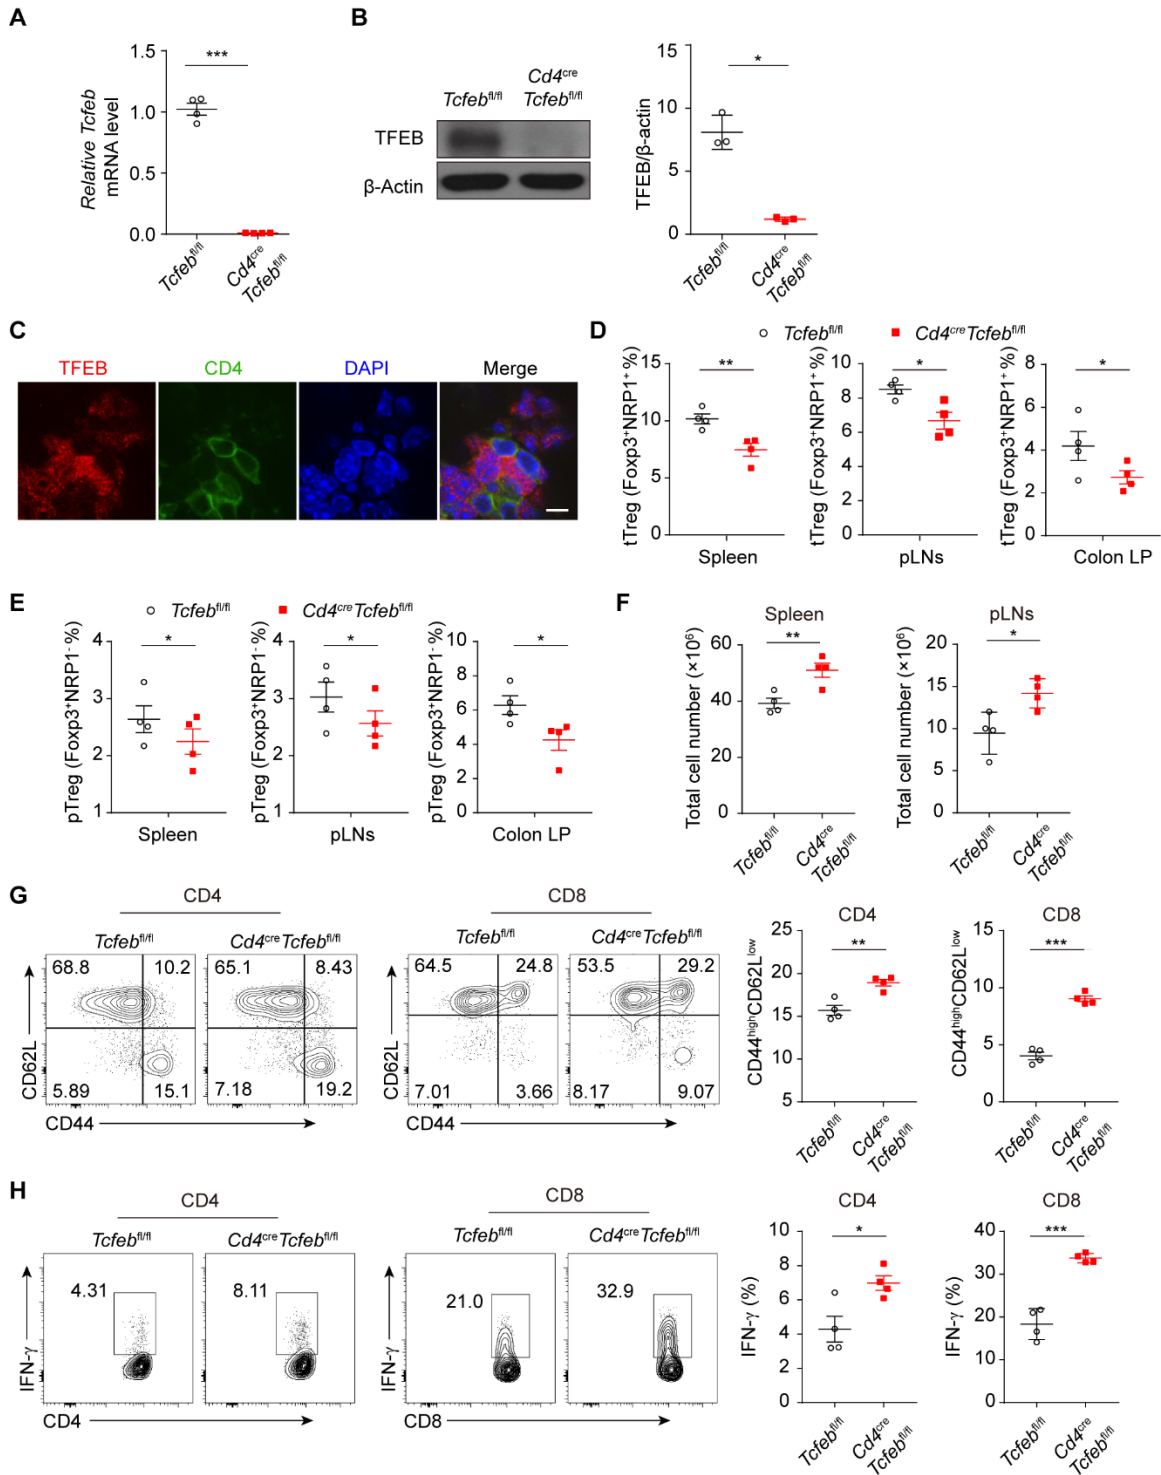

265  
266

267  
268  
269  
270  
271  
272  
273  
274  
275  
276

**Figure S3**

(A, B) Total cell numbers (A) and frequencies of Treg cells (B) in spleen and pLNs of 8-wk-old *Foxp3*<sup>YFP-Cre</sup> mice or *Foxp3*<sup>YFP-Cre</sup>*Tcfef*<sup>fl/fl</sup> mice (n=6). (C) Spleen weights in *Rag2*<sup>-/-</sup> mice receiving CD4<sup>+</sup>CD25<sup>-</sup>CD45RB<sup>high</sup> T cells alone or in combination with either WT or *Tcfef*-knockout CD4<sup>+</sup>CD25<sup>+</sup>YFP<sup>+</sup> Treg cells (n=5). (D) Flow cytometric analysis (left) and frequencies and numbers (right) of IL-17 and IFN- $\gamma$ -producing CD4<sup>+</sup> T cells in the mesenteric LNs from recipient mice at 12 weeks after adoptive transfer (n=5). \**p* < 0.05. Data are representative of two independent experiments with similar results. Data are means  $\pm$  SEM and were analyzed by two-tailed, unpaired Student's *t*-test.

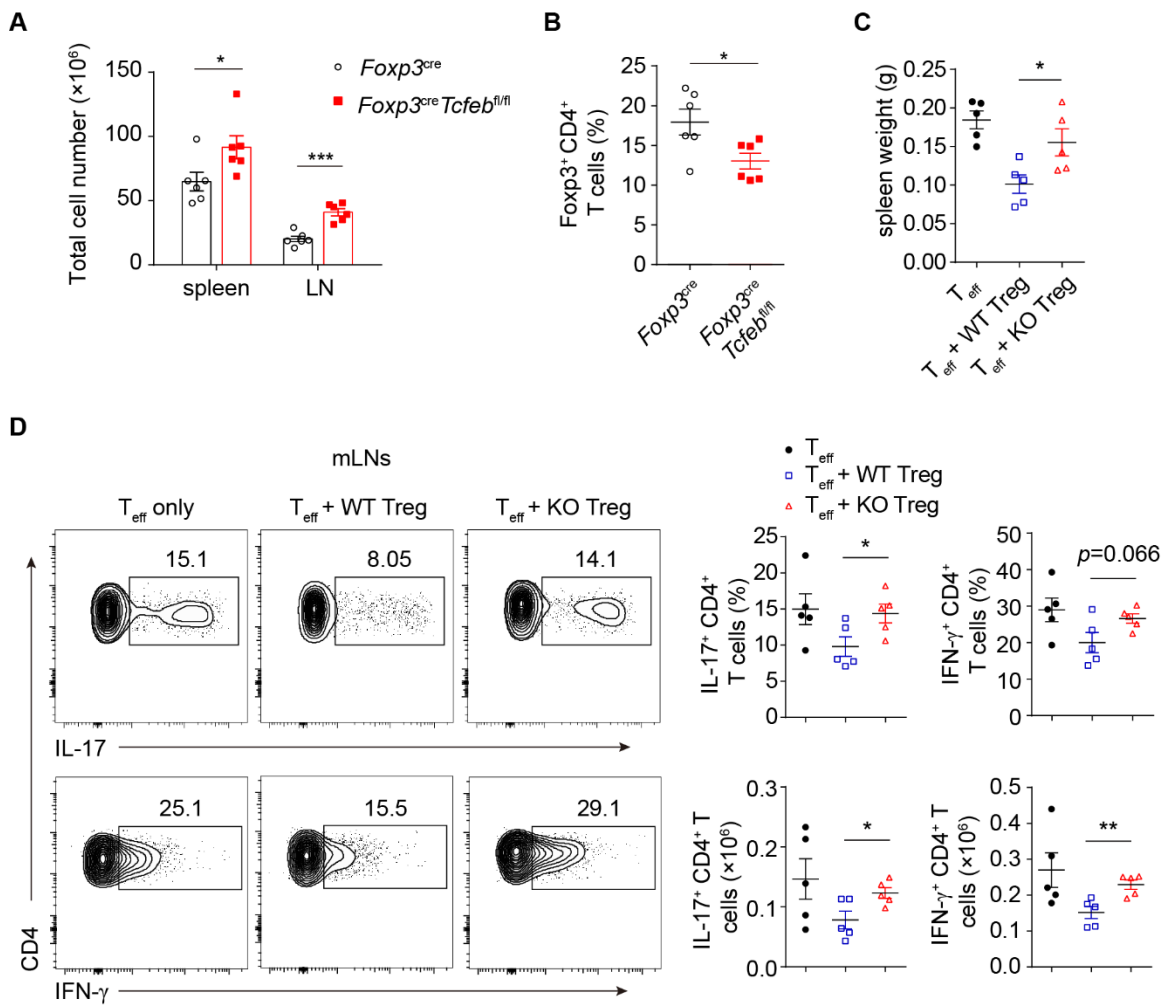

277  
278

279

**Figure S4**

280 (A) Flow cytometry gating strategy of *Foxp3*<sup>YFP-Cre</sup> (CD45.1<sup>+</sup>CD45.2<sup>+</sup>) and *Foxp3*<sup>YFP-Cre</sup>  
 281 *Tcf7l1*<sup>fl/fl</sup> (CD45.1<sup>-</sup>CD45.2<sup>+</sup>) Treg cells in chimera. (B) MFI of Foxp3 of wild-type  
 282 (CD45.1<sup>+</sup>CD45.2<sup>+</sup> *Foxp3*<sup>YFP-Cre</sup>) and *Tcf7l1*-deficient (CD45.1<sup>-</sup>CD45.2<sup>+</sup> *Foxp3*<sup>YFP-Cre</sup>  
 283 *Tcf7l1*<sup>fl/fl</sup>) CD4<sup>+</sup>Foxp3<sup>+</sup> Treg cells recovered in the spleens, pLNs and colonic lamina  
 284 propria (LP) from chimera (n=10 or 11). (C) Naive CD4<sup>+</sup> T cells isolated from *Foxp3*<sup>YFP-Cre</sup>  
 285 *Tcf7l1*<sup>fl/fl</sup> and *Foxp3*<sup>YFP-Cre</sup>*Tcf7l1*<sup>fl/fl</sup> mice were differentiated under Treg conditions for 3 days, and  
 286 then YFP<sup>+</sup> were sorted and cultured with plate-bound anti-CD3/anti-CD28 (1 μg/ml of each)  
 287 for 48 h. Representative flow cytometry plots and frequencies of Foxp3-positive cells were  
 288 determined. (D) Representative histograms and quantitative MFI of BCL2 in wild-type and  
 289 *Tcf7l1*-deficient Treg cells splenocytes of chimera (n=11). \**p* < 0.05, \*\**p* < 0.01, \*\*\* *p* <  
 290 0.001; Data are means ± SEM and were analyzed by two-tailed, paired Student's *t*-test.  
 291

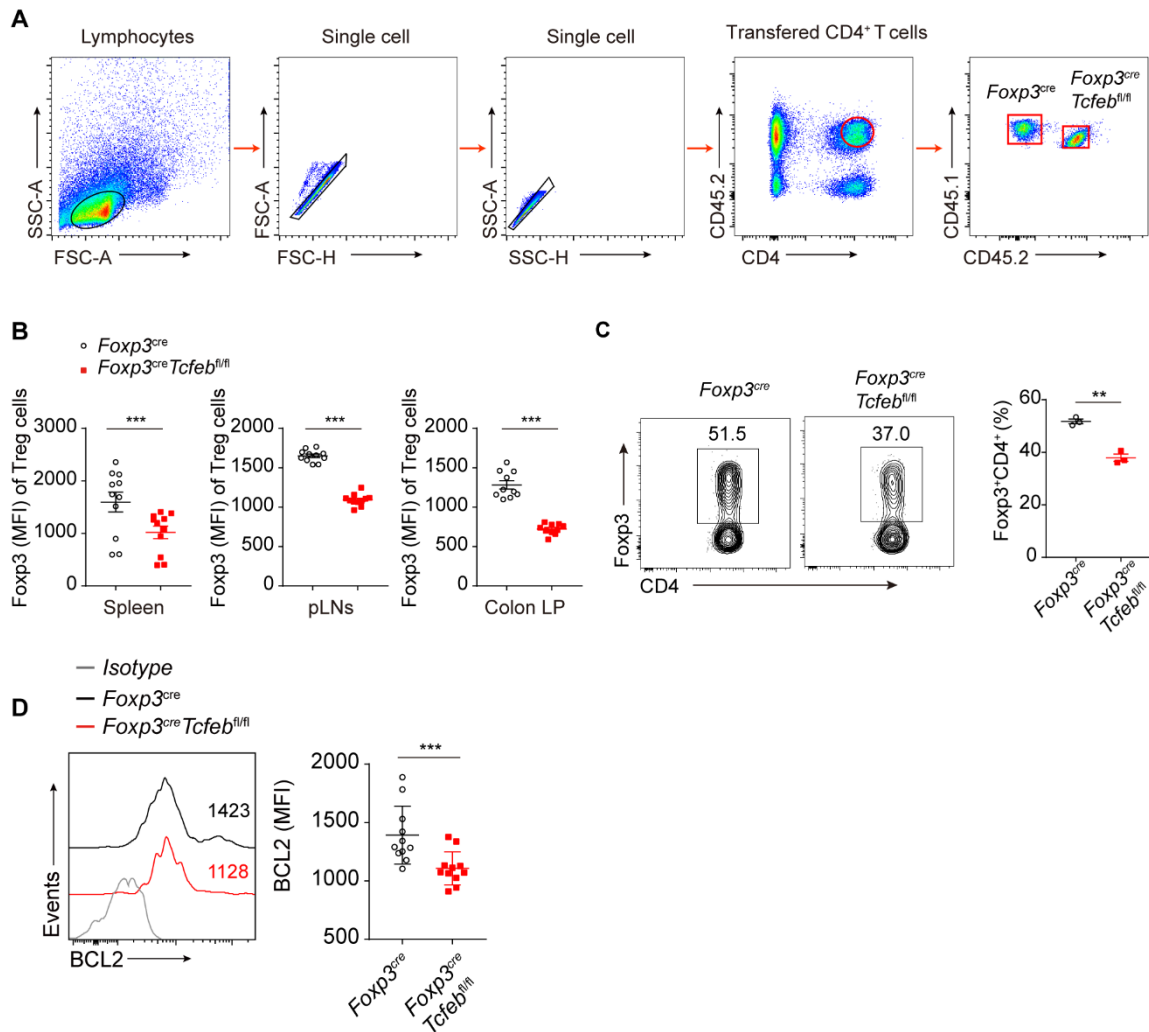

292

293

294 **Figure S5**  
295 (A, B) WT or *Tcfeb*-deficient naive CD4<sup>+</sup> T cells were differentiated under Treg condition  
296 in the absence or presence of rapamycin (100 nM) for 60 h. The expressions of autophagy  
297 related genes (A) and lysosome related genes (B) were determined by RT-PCR. (C) Flow  
298 cytometric analysis (left) and quantitative MFI (right) of lysotracker in Treg cells  
299 differentiated from naïve CD4<sup>+</sup> T cells isolated from *Tcfeb*<sup>fl/fl</sup> mice and *Cd4*<sup>Cre</sup>*Tcfeb*<sup>fl/fl</sup> mice.  
300 (D) WT or *Tcfeb*-deficient naive CD4<sup>+</sup> T cells were differentiated under Treg condition for  
301 3 days in the absence or presence of rapamycin (100 nM) or BafA1 (100 nM). Protein  
302 expression was determined by immunoblot and quantified. (E, F) WT or *Tcfeb*-deficient  
303 naive CD4<sup>+</sup> T cells were differentiated under Treg conditions, in the presence of rapamycin  
304 (100 nM), BafA1 (100 nM) and combination of rapamycin and BafA1 for 3 days. (E)  
305 Representative flow cytometry plots and (F) frequencies of CD4<sup>+</sup>Foxp3<sup>+</sup> Treg cells were  
306 determined. (G) WT or *Tcfeb*-deficient naive CD4<sup>+</sup> T cells were differentiated under Treg  
307 conditions, in the presence of rapamycin (100 nM) and 3-MA (5 mM) for 3 days. LC-3 and  
308 p62 expression were determined by western blot. ns, no significance \*p < 0.05, \*\*p < 0.01,  
309 \*\*\* p < 0.001; Data are means ± SEM and were analyzed by two-tailed, paired Student's  
310 t-test (C) and two-way ANOVA (D, F).  
311

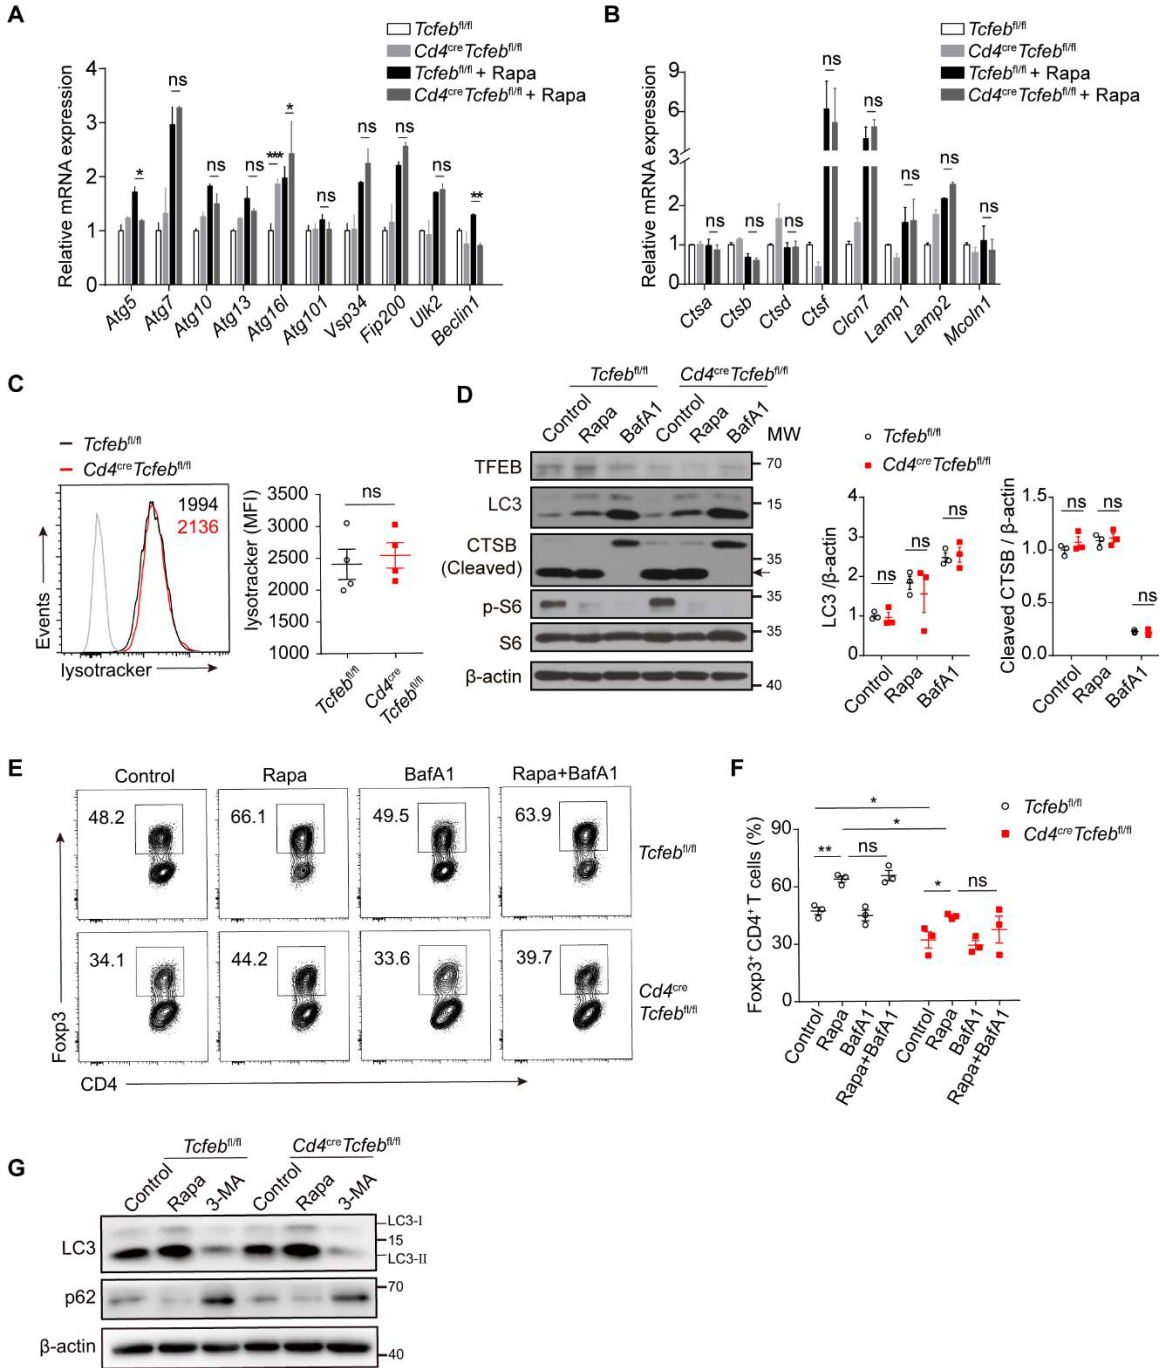

312  
313

314 **Figure S6**  
315 (A, B) Heatmap showing the expression patterns of Treg-related genes and fatty acid  
316 metabolism related genes in WT and TFEB-deficient iTregs. The color density indicates  
317 the expression of genes, each row was scaled by z-score. (C) Real-time PCR analysis of  
318 mitochondria-related genes were shown. (D, E) Naïve CD4<sup>+</sup> T cells isolated from  
319 *Foxp3*<sup>YFP-Cre</sup> and *Foxp3*<sup>YFP-Cre</sup>*Tcfef*<sup>fl/fl</sup> mice were differentiated under Treg conditions for  
320 3 days, and then YFP<sup>+</sup> WT and TFEB-deficient Treg cells were sorted by flow cytometry.  
321 Sorted YFP<sup>+</sup> Treg cell were used for RT-PCR analysis of mitochondria-related genes (D)  
322 and immune-related genes (E). (F, G) Representative histogram (F) and MFI quantification  
323 (G) of TMRE in WT and *Tcfef*-deficient Th0 or Treg cells. (H) Extracellular acidification  
324 rate (ECAR) of WT and *Tcfef*-deficient Treg cells were shown. (I) CD4<sup>+</sup>YFP<sup>+</sup> Treg cells  
325 sorted from *Foxp3*<sup>YFP-Cre</sup> mice or *Foxp3*<sup>YFP-Cre</sup>*Tcfef*<sup>fl/fl</sup> mice were transduced with *Myc*-  
326 encoding retrovirus or control retrovirus. After transduction, Treg cells were co-cultured  
327 with CTV (Cell Trace Violet)-labeled WT naïve CD4<sup>+</sup> T cells at 1:2 ratio in the presence  
328 of plate-bound anti-CD3/anti-CD28 (1 µg/ml of each). The proliferative ability of T  
329 effector cells were determined by divided cells in the histograms. \**p* < 0.05, \*\**p* < 0.01,  
330 \*\*\**p* < 0.001. Data are representative of two experiments (H, I). Data are means ± SEM  
331 and were analyzed by two-tailed, unpaired Student's *t*-test (C-H) and two-way ANOVA  
332 (I).

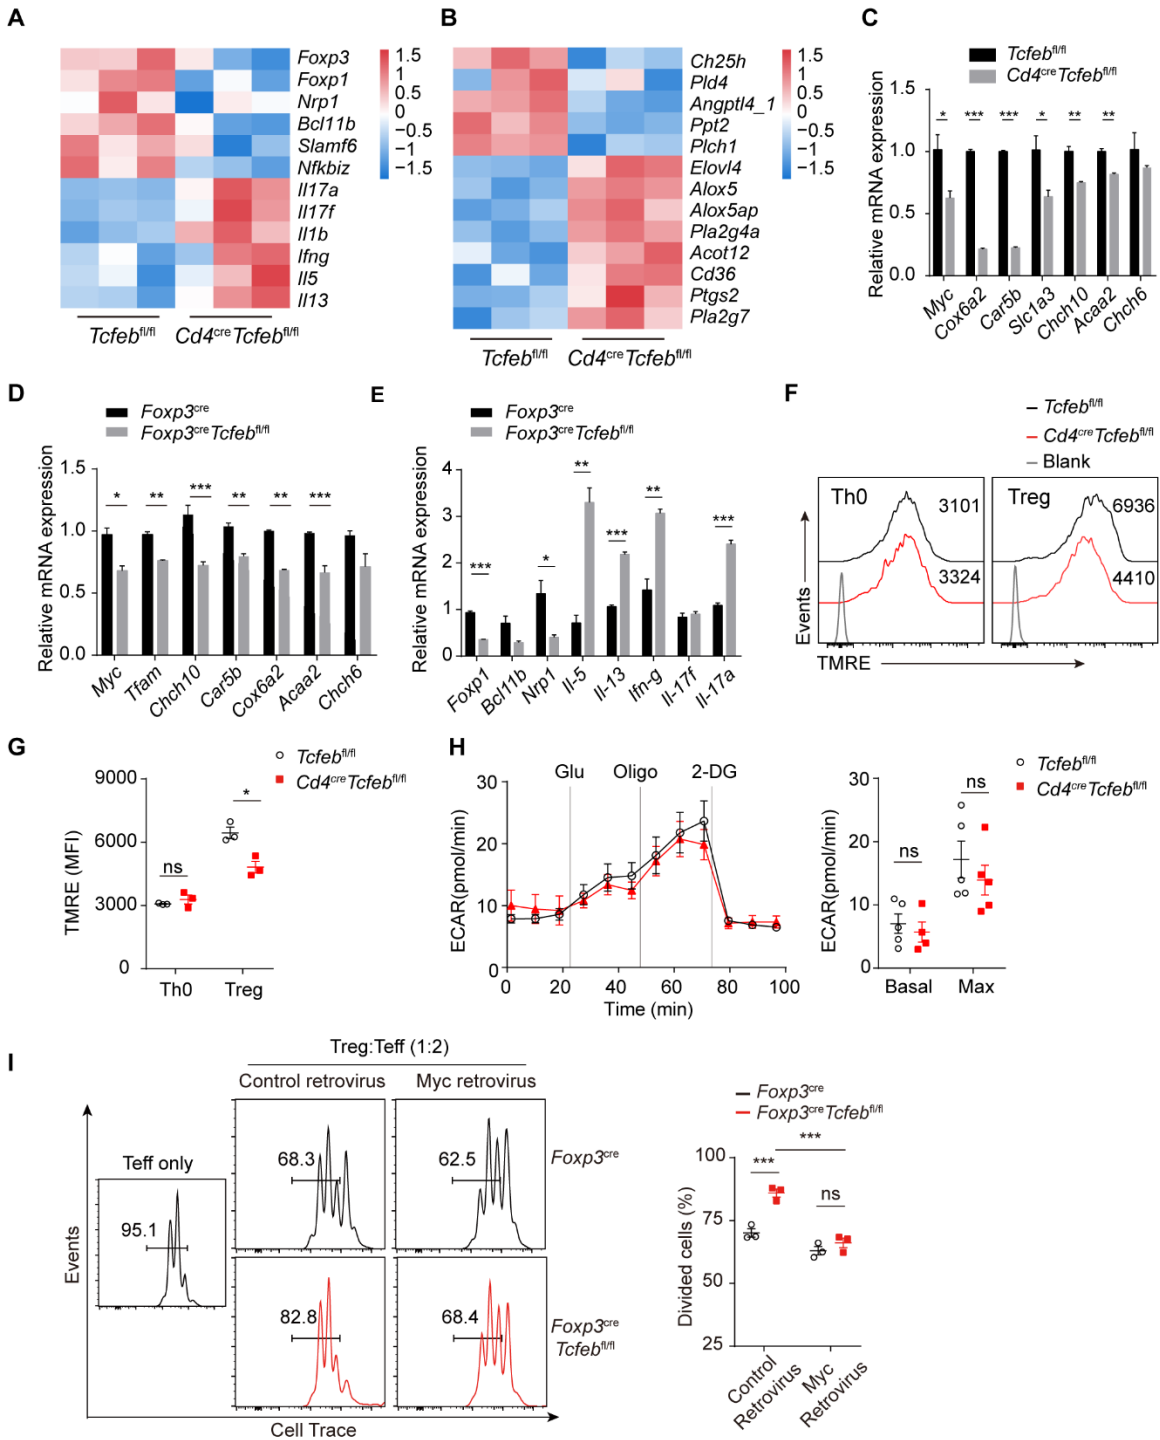

333  
334



335 **Figure S7**  
 336 (A, B) CFSE-labeled splenic CD8<sup>+</sup> T cells stimulated with plate-bound anti-CD3 (1 μg/ml)  
 337 and anti-CD28 (1 μg/ml) were co-cultured with indicated ratios of YFP<sup>+</sup> Treg cells sorted  
 338 from *Foxp3*<sup>YFP-cre</sup> mice and *Foxp3*<sup>YFP-cre</sup>*Tcfef*<sup>fl/fl</sup> mice for 72 h. Flow cytometric analysis  
 339 (A) and quantitative results (B) were shown. \* *p* < 0.05. Data are representative of four  
 340 experiments. Data are means ± SEM and were analyzed by two-tailed, unpaired Student's  
 341 *t*-test.  
 342

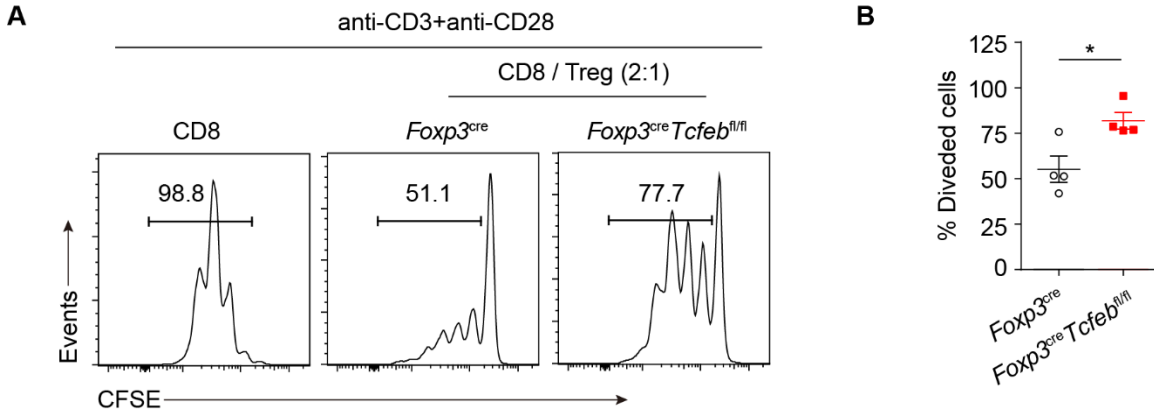

343  
 344

345 **SI References**

- 346 1. Ritchie ME, *et al.* (2015) limma powers differential expression analyses for RNA-  
347 sequencing and microarray studies. *Nucleic acids research* 43(7):e47.
- 348 2. Yu G, Wang LG, Han Y, & He QY (2012) clusterProfiler: an R package for  
349 comparing biological themes among gene clusters. *Omics : a journal of integrative*  
350 *biology* 16(5):284-287.
- 351 3. Zhang C, *et al.* (2019) TFEB Mediates Immune Evasion and Resistance to mTOR  
352 Inhibition of Renal Cell Carcinoma via Induction of PD-L1. *Clinical cancer*  
353 *research : an official journal of the American Association for Cancer Research*  
354 25(22):6827-6838.
- 355 4. Yu M, *et al.* (2021) Interferon- $\gamma$  induces tumor resistance to anti-PD-1  
356 immunotherapy by promoting YAP phase separation. *Molecular cell*.  
357
